# Supplementary material for: Novel non-helical antimicrobial peptides insert into and fuse lipid model membranes
Source: Royal Society of Chemistry journal article supplement (doi:10.1039/d4sm00220b), 2024-01-01
Supplement: d4sm00220b1.pdf [file d4sm00220b1.pdf]

## Supplementary Information

### Novel non-helical antimicrobial peptides insert into and fuse lipid model membranes

Saheli Mitra<sup>1</sup>, Bhairavi Chandarsekhar<sup>1</sup>, Yunshu Li<sup>1</sup>, Mark Coopershlyak<sup>1</sup>, Margot E. Mahoney<sup>1</sup>, Brandt Evans<sup>1</sup>, Rachel Koenig<sup>1</sup>, Stephen C. L. Hall<sup>2</sup>, Beate Klösgen<sup>3</sup>, Frank Heinrich<sup>1,4</sup>, Berthony Deslouches<sup>5</sup>,  
Stephanie Tristram-Nagle<sup>1\*</sup>

<sup>1</sup>Biological Physics Group, Physics Department, Carnegie Mellon University, Pittsburgh, PA 15213, USA;

<sup>2</sup>ISIS Neutron and Muon Source, Rutherford Appleton Laboratory, Harwell Campus, Didcot, Oxfordshire,

OX11 0QX, UK; <sup>3</sup>University of Southern Denmark, Dept. Physics, Chemistry & Pharmacy, PhyLife,

Campusvej 55, ODENSE M 5230, Denmark; <sup>4</sup>Center for Neutron Research, National Institute of Standards

and Technology, Gaithersburg, MD 20899, USA; <sup>5</sup>Department of Environmental and Occupational Health, University of Pittsburgh, Pittsburgh, PA 15261, USA

\*Corresponding author's email: [stn@cmu.edu](mailto:stn@cmu.edu)

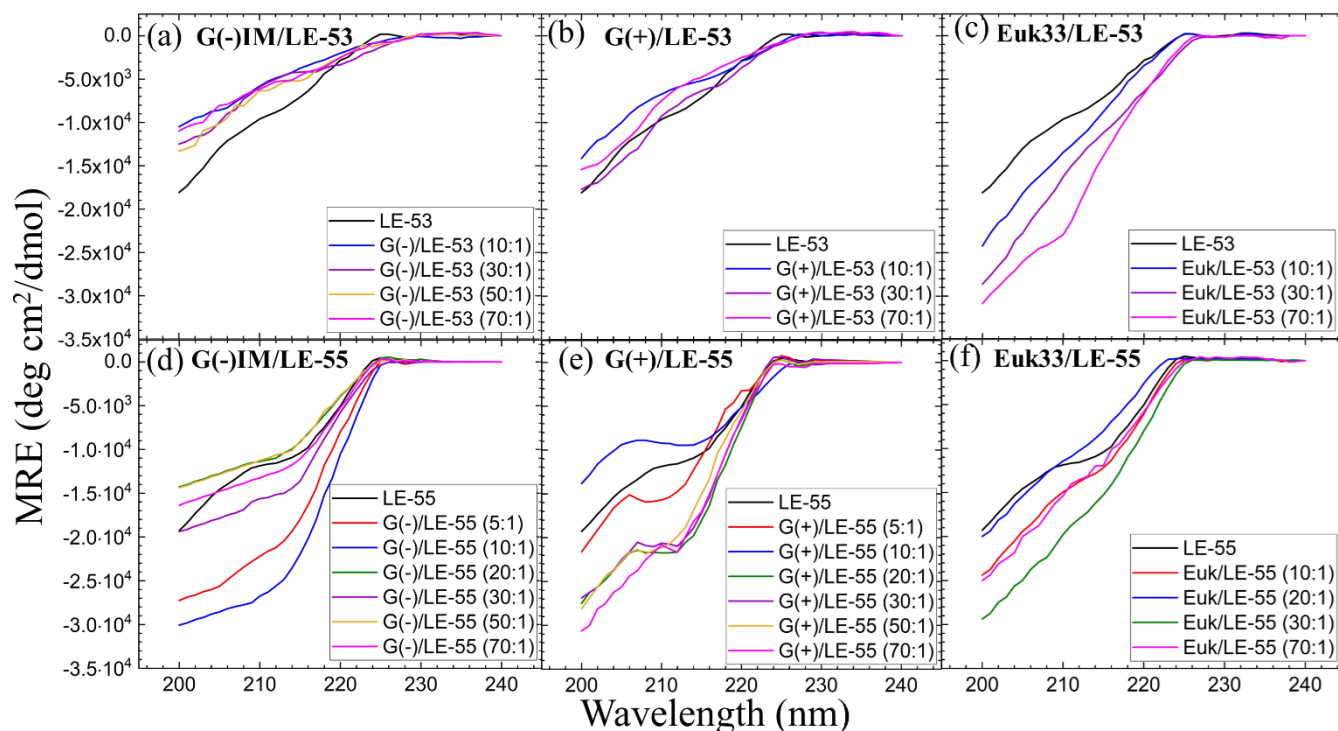

**Fig. S1** MRE results of LE-53 (a, b and c) and LE-55 (d, e and f) in G(-)IM, G(+), and Euk33 LMM ULVs.

Tables S1 – S6 summarize secondary structural results (%  $\alpha$ -helix,  $\beta$ -sheet,  $\beta$ -turn and random coil) for LE-53 and LE-55 peptides in three LMMs.  $R^2$  indicates the goodness of fit. Std. devs. were generally ~5-7 % of the values shown.

**Table S1. LE-53 CD results of secondary structure in G(-) IM LMMs**

| <b>G(-) IM/LE-53</b> | <b><math>\alpha</math>-helix (%)</b> | <b><math>\beta</math>-sheet (%)</b> | <b><math>\beta</math>-turn (%)</b> | <b>Random</b>  | <b><math>R^2</math></b> |
|----------------------|--------------------------------------|-------------------------------------|------------------------------------|----------------|-------------------------|
| 0:1                  | 0 $\pm$ 0                            | 38.9 $\pm$ 1.1                      | 0 $\pm$ 0                          | 61.1 $\pm$ 1.1 | 0.99                    |
| 10:1                 | 12.1 $\pm$ 2.6                       | 26.2 $\pm$ 2.5                      | 0 $\pm$ 0                          | 61.4 $\pm$ 1.4 | 0.98                    |
| 20:1                 | 0 $\pm$ 0                            | 41.4 $\pm$ 0.8                      | 0 $\pm$ 0                          | 58.6 $\pm$ 0.8 | 0.98                    |
| 30:1                 | 0 $\pm$ 0                            | 39.6 $\pm$ 0.2                      | 0 $\pm$ 0                          | 60.4 $\pm$ 0.2 | 0.98                    |
| 50:1                 | 0 $\pm$ 0                            | 39.2 $\pm$ 1.0                      | 0 $\pm$ 0                          | 60.8 $\pm$ 1.0 | 0.99                    |

**Table S2. LE-53 CD results of secondary structure in G(+) LMMs**

| <b>G(+)/LE-53</b> | <b><math>\alpha</math>-helix (%)</b> | <b><math>\beta</math>-sheet (%)</b> | <b><math>\beta</math>-turn (%)</b> | <b>Random</b>  | <b><math>R^2</math></b> |
|-------------------|--------------------------------------|-------------------------------------|------------------------------------|----------------|-------------------------|
| 0:1               | 0 $\pm$ 0                            | 41.1 $\pm$ 0.5                      | 0 $\pm$ 0                          | 58.9 $\pm$ 0.5 | 0.99                    |
| 10:1              | 0 $\pm$ 0                            | 41.7 $\pm$ 0.4                      | 0 $\pm$ 0                          | 58.3 $\pm$ 0.4 | 0.99                    |
| 30:1              | 0 $\pm$ 0                            | 41.0 $\pm$ 0.4                      | 0 $\pm$ 0                          | 59.0 $\pm$ 0.4 | 0.99                    |
| 70:1              | 0 $\pm$ 0                            | 39.3 $\pm$ 0.6                      | 0 $\pm$ 0                          | 60.7 $\pm$ 0.6 | 0.99                    |

**Table S3. LE-53 CD results of secondary structure in Euk33 LMMs**

| <b>Euk33/LE-53</b> | <b><math>\alpha</math>-helix (%)</b> | <b><math>\beta</math>-sheet (%)</b> | <b><math>\beta</math>-turn (%)</b> | <b>Random</b>  | <b><math>R^2</math></b> |
|--------------------|--------------------------------------|-------------------------------------|------------------------------------|----------------|-------------------------|
| 0:1                | 0 $\pm$ 0                            | 41.1 $\pm$ 0.5                      | 0 $\pm$ 0                          | 58.9 $\pm$ 0.5 | 0.99                    |
| 10:1               | 0 $\pm$ 0                            | 40.4 $\pm$ 1.4                      | 0 $\pm$ 0                          | 59.6 $\pm$ 1.4 | 0.99                    |
| 30:1               | 0 $\pm$ 0                            | 40.9 $\pm$ 0.0                      | 0 $\pm$ 0                          | 59.4 $\pm$ 0.4 | 0.99                    |
| 70:1               | 0 $\pm$ 0                            | 42.9 $\pm$ 0.7                      | 0 $\pm$ 0                          | 57.1 $\pm$ 0.7 | 0.99                    |

**Table S4. LE-55 CD results of secondary structure in G(-) IM LMMs**

| <b>G(-) IM/LE-55</b> | <b><math>\alpha</math>-helix (%)</b> | <b><math>\beta</math>-sheet (%)</b> | <b><math>\beta</math>-turn (%)</b> | <b>Random</b>  | <b>R<sup>2</sup></b> |
|----------------------|--------------------------------------|-------------------------------------|------------------------------------|----------------|----------------------|
| 0:1                  | 0 $\pm$ 0                            | 43.5 $\pm$ 1.5                      | 0 $\pm$ 0                          | 56.5 $\pm$ 1.5 | 0.96                 |
| 5:1                  | 0 $\pm$ 0                            | 45.0 $\pm$ 0.1                      | 0 $\pm$ 0                          | 55.0 $\pm$ 0.1 | 0.97                 |
| 10:1                 | 0 $\pm$ 0                            | 46.2 $\pm$ 0.3                      | 0 $\pm$ 0                          | 53.8 $\pm$ 0.3 | 0.94                 |
| 20:1                 | 0 $\pm$ 0                            | 43.5 $\pm$ 3.0                      | 0 $\pm$ 0                          | 56.5 $\pm$ 3.0 | 0.98                 |
| 30:1                 | 0 $\pm$ 0                            | 45.7 $\pm$ 1.9                      | 0 $\pm$ 0                          | 54.3 $\pm$ 1.9 | 0.97                 |
| 50:1                 | 0 $\pm$ 0                            | 45.4 $\pm$ 1.8                      | 0 $\pm$ 0                          | 54.6 $\pm$ 1.8 | 0.97                 |
| 70:1                 | 0 $\pm$ 0                            | 45.3 $\pm$ 0.4                      | 0 $\pm$ 0                          | 54.7 $\pm$ 0.4 | 0.96                 |

**Table S5. LE-55 CD results of secondary structure in G(+) LMMs**

| <b>G(+)/LE-55</b> | <b><math>\alpha</math>-helix (%)</b> | <b><math>\beta</math>-sheet (%)</b> | <b><math>\beta</math>-turn (%)</b> | <b>Random</b>  | <b>R<sup>2</sup></b> |
|-------------------|--------------------------------------|-------------------------------------|------------------------------------|----------------|----------------------|
| 0:1               | 0 $\pm$ 0                            | 43.5 $\pm$ 1.5                      | 0 $\pm$ 0                          | 56.5 $\pm$ 1.5 | 0.96                 |
| 5:1               | 0 $\pm$ 0                            | 41.8 $\pm$ 1.2                      | 0 $\pm$ 0                          | 58.2 $\pm$ 1.2 | 0.98                 |
| 10:1              | 0 $\pm$ 0                            | 43.3 $\pm$ 0.9                      | 0 $\pm$ 0                          | 56.7 $\pm$ 0.9 | 0.99                 |
| 20:1              | 0 $\pm$ 0                            | 43.4 $\pm$ 1.2                      | 0 $\pm$ 0                          | 56.6 $\pm$ 1.2 | 0.96                 |
| 30:1              | 0 $\pm$ 0                            | 42.7 $\pm$ 0.2                      | 0 $\pm$ 0                          | 57.3 $\pm$ 0.2 | 0.98                 |
| 50:1              | 0 $\pm$ 0                            | 42.9 $\pm$ 1.5                      | 0 $\pm$ 0                          | 57.2 $\pm$ 1.5 | 0.97                 |
| 70:1              | 0 $\pm$ 0                            | 42.5 $\pm$ 1.0                      | 0 $\pm$ 0                          | 57.5 $\pm$ 1.0 | 0.97                 |

**Table S6. LE-55 CD results of secondary structure in Euk33 LMMs**

| <b>Euk33/LE-55</b> | <b><math>\alpha</math>-helix (%)</b> | <b><math>\beta</math>-sheet (%)</b> | <b><math>\beta</math>-turn (%)</b> | <b>Random</b>  | <b>R<sup>2</sup></b> |
|--------------------|--------------------------------------|-------------------------------------|------------------------------------|----------------|----------------------|
| 0:1                | 0 $\pm$ 0                            | 43.5 $\pm$ 1.5                      | 0 $\pm$ 0                          | 56.5 $\pm$ 1.5 | 0.96                 |
| 10:1               | 0 $\pm$ 0                            | 44.1 $\pm$ 1.6                      | 0 $\pm$ 0                          | 55.9 $\pm$ 1.6 | 0.99                 |
| 20:1               | 0 $\pm$ 0                            | 43.1 $\pm$ 2.5                      | 0 $\pm$ 0                          | 56.9 $\pm$ 2.5 | 0.99                 |
| 30:1               | 0 $\pm$ 0                            | 44.9 $\pm$ 1.8                      | 0 $\pm$ 0                          | 55.1 $\pm$ 1.8 | 0.99                 |
| 70:1               | 0 $\pm$ 0                            | 44.0 $\pm$ 1.1                      | 0 $\pm$ 0                          | 56.0 $\pm$ 1.1 | 0.99                 |

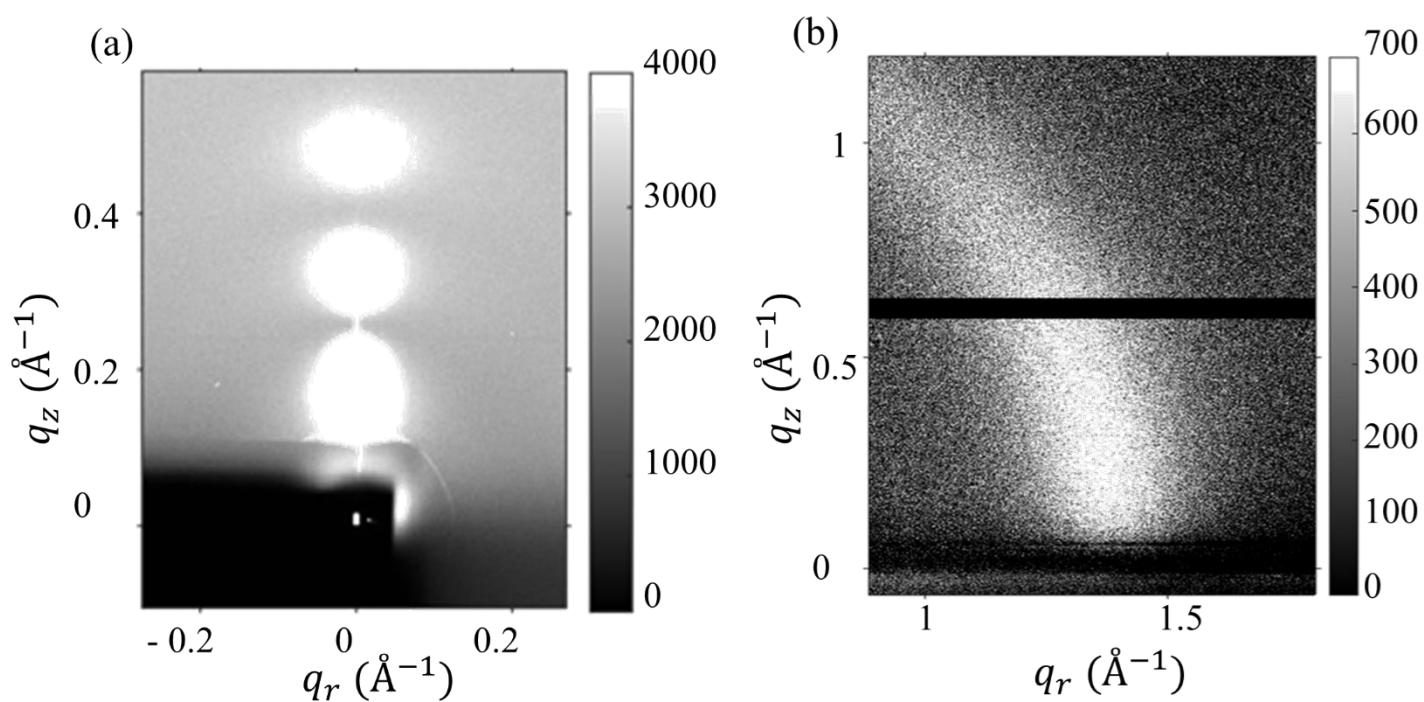

**Fig. S2** XDS data obtained at CHESS. Results of 250:1 G(-)IM/LE-53 at 37 °C. **(a)** Low angle x-ray scattering (LAXS). The sample is fully hydrated with a D-spacing of 102 Å. Three lobes of diffuse x-ray scattering result from fluctuations in the oriented stack of membranes at high hydration. **(b)** Wide angle x-ray scattering (WAXS). The chain correlation is the intensity centered at  $q_r \cong 1.4 \text{ \AA}^{-1}$  which corresponds to  $\cong 4.5 \text{ \AA}$  d-spacing. Light grey indicates positive intensity values (see color bars). Black line contains no intensity information and was removed during data analysis.

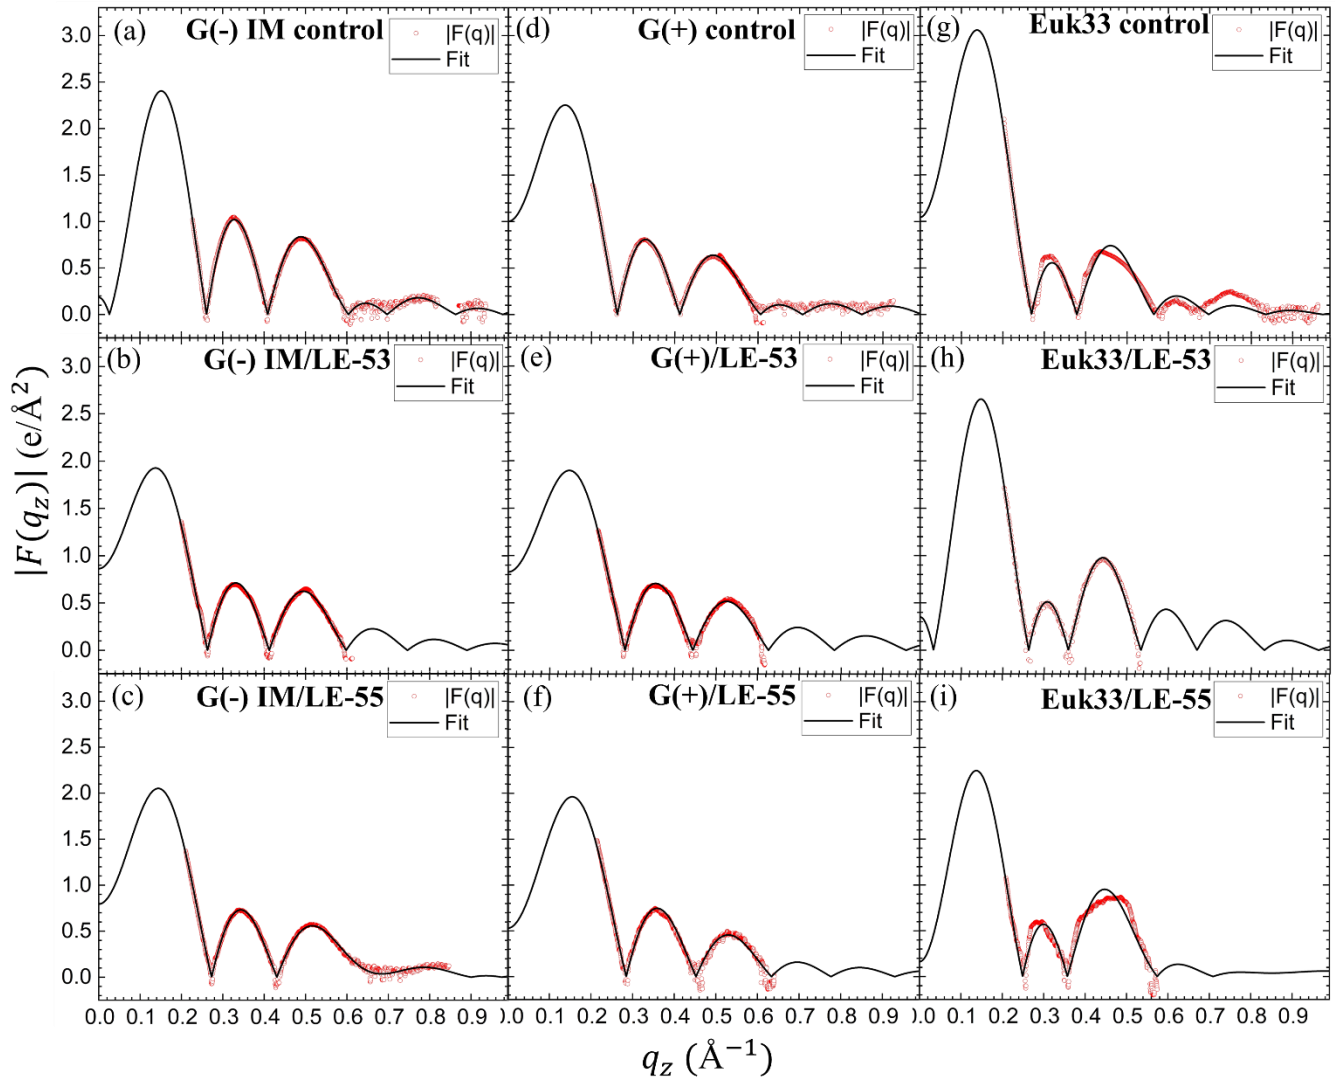

**Fig. S3**  $|F(q_z)|$  for G(-) IM LMMs (a – c), G(+) LMMs (d - f) and Euk33 LMMs (g - i) in the presence of LE-53 and LE-55. The red points are experimental data, and the black line is the SDP model fit to the data. Lipid/peptide molar ratio is 75:1.

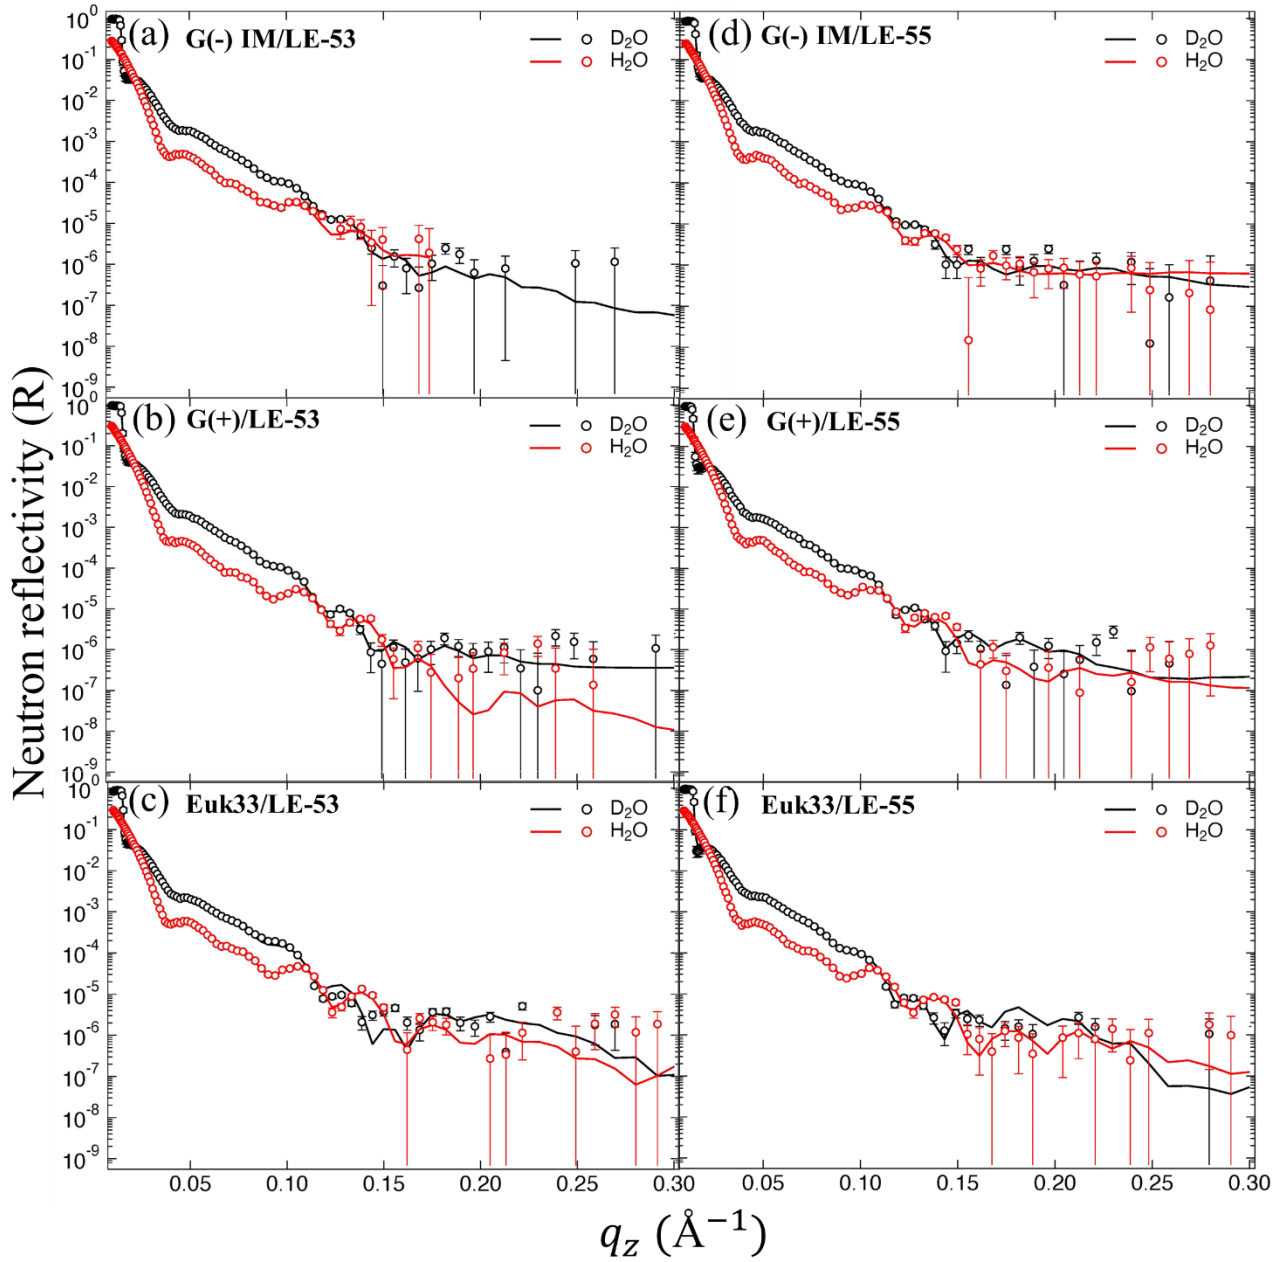

**Fig. S4** Neutron reflectivity scattering length profiles of G(-) IM LMMs (**a and d**), G(+) LMMs (**b and e**) and Euk33 LMMs (**c and f**) in the presence of LE-53 and LE-55. The solid black and red lines are the fits to the D<sub>2</sub>O and H<sub>2</sub>O data respectively.

**Table S7.** NR results of LE-53 and LE-55 in G(-)IM, G(+) and Euk33 LMMs.

| Parameter                                                           | G(-)/LE-53      | G(+)/LE-53      | G(-)/LE-55      | G(+)/LE-55      | Euk33 LE-53     | Euk33 LE-55     |
|---------------------------------------------------------------------|-----------------|-----------------|-----------------|-----------------|-----------------|-----------------|
| <b>Substrate</b>                                                    |                 |                 |                 |                 |                 |                 |
| SiOx nSLD / $10^{-6} \text{ \AA}^{-2}$                              | $3.2 \pm 0.2$   | $3.3 \pm 0.2$   | $3.3 \pm 0.1$   | $3.3 \pm 0.2$   | $3.2 \pm 0.1$   | $3.2 \pm 0.1$   |
| SiOx thickness / $\text{\AA}$                                       | $24 \pm 13$     | $21 \pm 12$     | $24 \pm 11$     | $25 \pm 15$     | $25 \pm 14$     | $25 \pm 14$     |
| Cr nSLD / $10^{-6} \text{ \AA}^{-2}$                                | $3.3 \pm 0.4$   | $3.1 \pm 0.2$   | $3.3 \pm 0.3$   | $3.3 \pm 0.5$   | $3.3 \pm 0.4$   | $3.2 \pm 0.4$   |
| Cr thickness / $\text{\AA}$                                         | $26 \pm 9$      | $26 \pm 11$     | $24 \pm 9$      | $24 \pm 9$      | $26 \pm 12$     | $25 \pm 11$     |
| Au nSLD / $10^{-6} \text{ \AA}^{-2}$                                | $4.5 \pm 0.1$   | $4.4 \pm 0.1$   | $4.52 \pm 0.09$ | $4.67 \pm 0.07$ | $4.65 \pm 0.09$ | $4.5 \pm 0.1$   |
| Au thickness / $\text{\AA}$                                         | $168 \pm 6$     | $169 \pm 3$     | $169 \pm 4$     | $169 \pm 5$     | $171 \pm 3$     | $168 \pm 5$     |
| R.M.S. roughness / $\text{\AA}$                                     | $8 \pm 2$       | $8 \pm 1$       | $9 \pm 2$       | $7 \pm 1$       | $2.4 \pm 0.3$   | $4 \pm 1$       |
| <b>Bilayer</b>                                                      |                 |                 |                 |                 |                 |                 |
| R.M.S. roughness / $\text{\AA}$                                     | $5 \pm 1$       | $7 \pm 1$       | $6 \pm 1$       | $7 \pm 2$       | $2.6 \pm 0.5$   | $4 \pm 1$       |
| Tether thickness / $\text{\AA}$                                     | $10 \pm 2$      | $10 \pm 2$      | $9 \pm 2$       | $10 \pm 2$      | $10 \pm 1$      | $10 \pm 2$      |
| Hydrocarbon thickness inner lipid leaflet / $\text{\AA}$            | $16 \pm 4$      | $19 \pm 3$      | $17 \pm 4$      | $18 \pm 3$      | $19 \pm 3$      | $19 \pm 3$      |
| Hydrocarbon thickness outer lipid leaflet / $\text{\AA}$            | $16 \pm 4$      | $14 \pm 3$      | $17 \pm 4$      | $14 \pm 3$      | $16 \pm 4$      | $15 \pm 3$      |
| Area per lipid, outer leaflet / $\text{\AA}^2$                      | $70 \pm 20$     | $90 \pm 20$     | $70 \pm 20$     | $80 \pm 20$     | $60 \pm 10$     | $60 \pm 10$     |
| Bilayer completeness / %                                            | $90 \pm 8$      | $94 \pm 5$      | $92 \pm 6$      | $92 \pm 6$      | $97 \pm 3$      | $98 \pm 2$      |
| <b>Peptide</b>                                                      |                 |                 |                 |                 |                 |                 |
| Amount of membrane-associated protein / $\text{\AA}^3/\text{\AA}^2$ | $6 \pm 3$       | $4 \pm 2$       | $5 \pm 2$       | $5 \pm 2$       | $2 \pm 1$       | $3 \pm 1$       |
| Fraction of protein in hydrocarbons                                 | $0.51 \pm 0.18$ | $0.70 \pm 0.13$ | $0.62 \pm 0.12$ | $0.66 \pm 0.13$ | $0.80 \pm 0.18$ | $0.68 \pm 0.16$ |
| Fraction of protein in headgroups                                   | $0.24 \pm 0.08$ | $0.23 \pm 0.08$ | $0.23 \pm 0.07$ | $0.24 \pm 0.06$ | $0.17 \pm 0.16$ | $0.24 \pm 0.12$ |
| Fraction of protein in bulk solvent                                 | $0.19 \pm 0.14$ | $0.04 \pm 0.04$ | $0.10 \pm 0.08$ | $0.05 \pm 0.04$ | $0.02 \pm 0.02$ | $0.02 \pm 0.02$ |
| Peak position from headgroup / solvent interface / $\text{\AA}$     | $-16 \pm 6$     | $-14 \pm 4$     | $-13 \pm 5$     | $-13 \pm 3$     | $-23 \pm 11$    | $-16 \pm 6$     |
| <b>General</b>                                                      |                 |                 |                 |                 |                 |                 |
| Goodness of fit, chi-squared                                        | 1.4             | 0.9             | 1.3             | 2.2             | 4.0             | 2.4             |

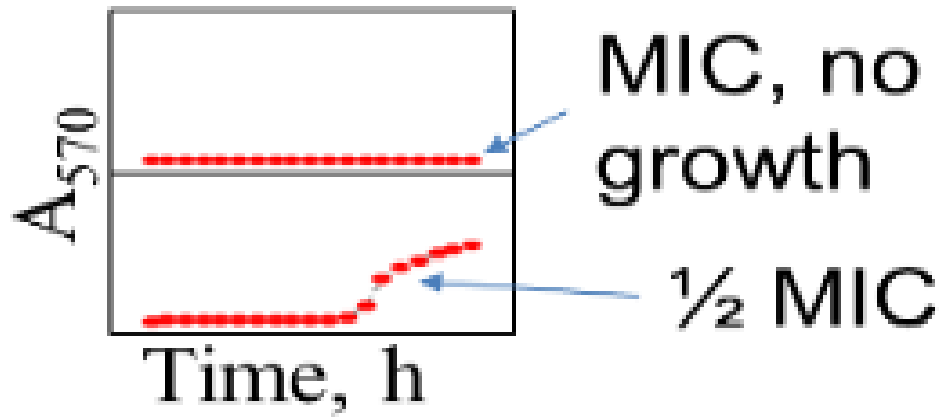

**Fig. S5** Assessment of MIC: using a plate reader bacterial turbidity is detected every hour, represented by a red dot, for 18 hours. The growth kinetics, shown as a flat line moved higher, indicate no bacterial growth. The lowest concentration corresponding to a flat growth kinetics line is the MIC or minimum inhibitory concentration.
